# Supplementary material
Source: MDPI journal article supplement (https://www.mdpi.com/2079-6412/13/12/2034)
Supplement: s1 [file s1]

# Optimizing the Local Charge of Graphene via Iron Doping to Promote the Adsorption of Formaldehyde Molecules—A Density Functional Theory Study

Xiao Zhang <sup>1</sup>, Chen Chen <sup>2,\*</sup>, Ting Cheng <sup>1</sup>, Yizhuo Yang <sup>2</sup>, Jiabin Liu <sup>2</sup>, Jiarui Zhu <sup>2</sup>, Baoxuan Hou <sup>2</sup>, Xin Xin <sup>2</sup> and Mingyue Wen <sup>2</sup>

<sup>1</sup> School of Environmental Ecology, Jiangsu City Vocational College, Nanjing 210017, China; zhangxiao@jsou.edu.cn (X.Z.); wenchengting@sina.com (T.C.)

<sup>2</sup> School of Environmental and Chemical Engineering, Jiangsu University of Science and Technology, Zhenjiang 212100, China; hznuyyz@163.com (Y.Y.); ljxdhr012@163.com (J.L.); zjr000323@163.com (J.Z.); hbx.1999@outlook.com (B.H.); xin\_xiny@163.com (X.X.); mingyuewen1998@hotmail.com (M.W.)

\* Correspondence: chenc@just.edu.cn; Tel./Fax: +86-0511-85639001

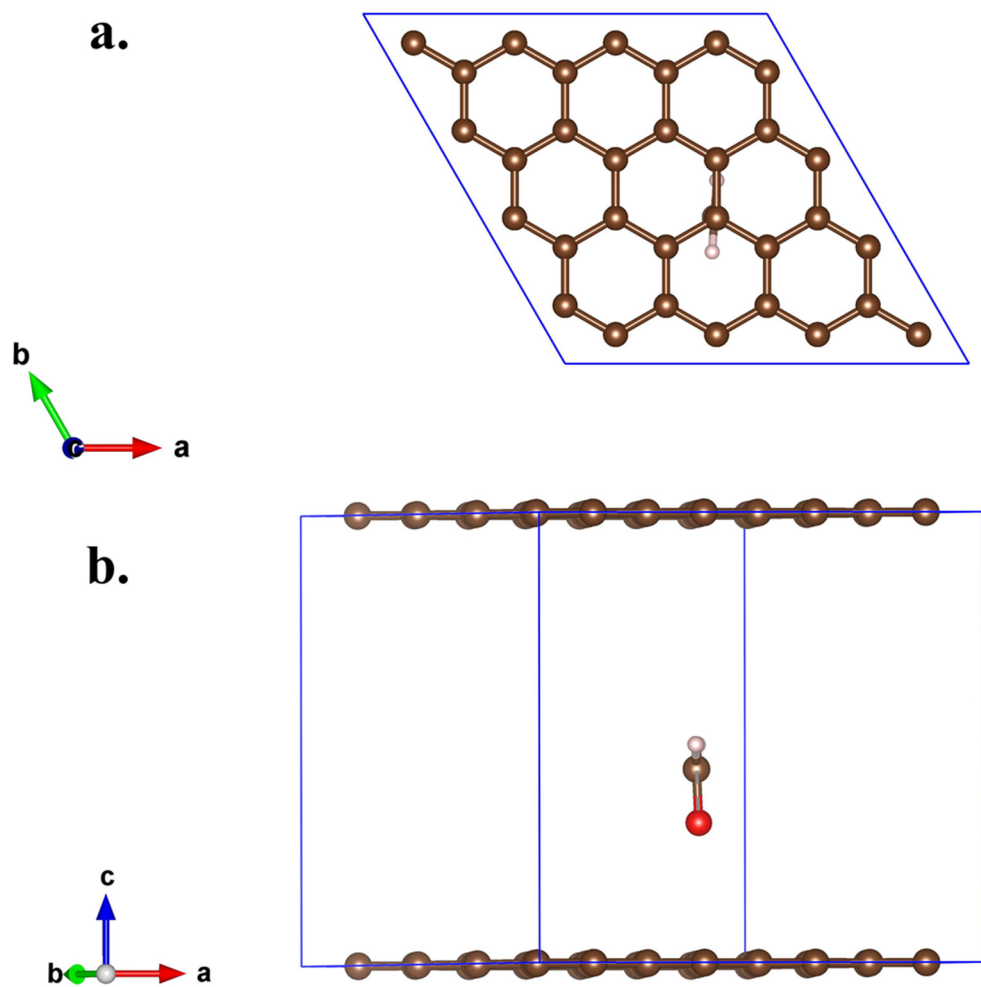

Figure S1. The original configuration (a) of formaldehyde molecules adsorbed on GH substrate.

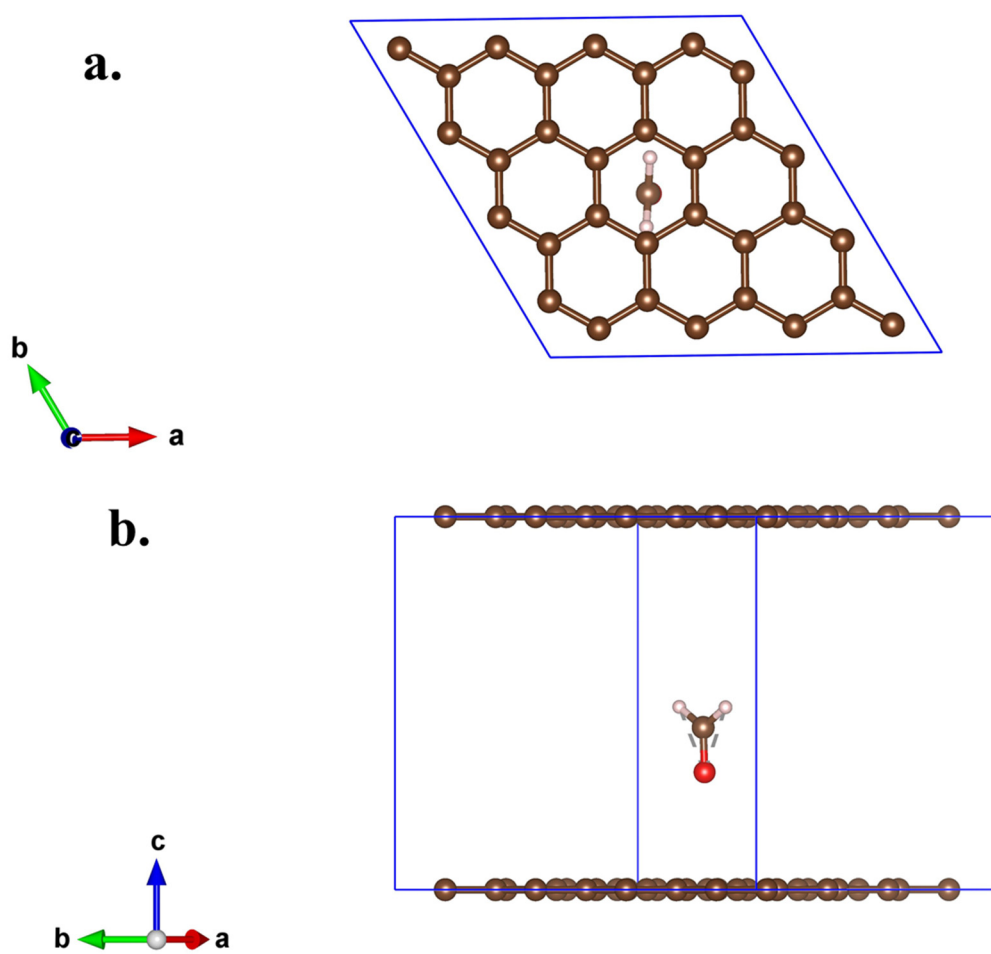

Figure S2. The original configuration (b) of formaldehyde molecules adsorbed on GH substrate.

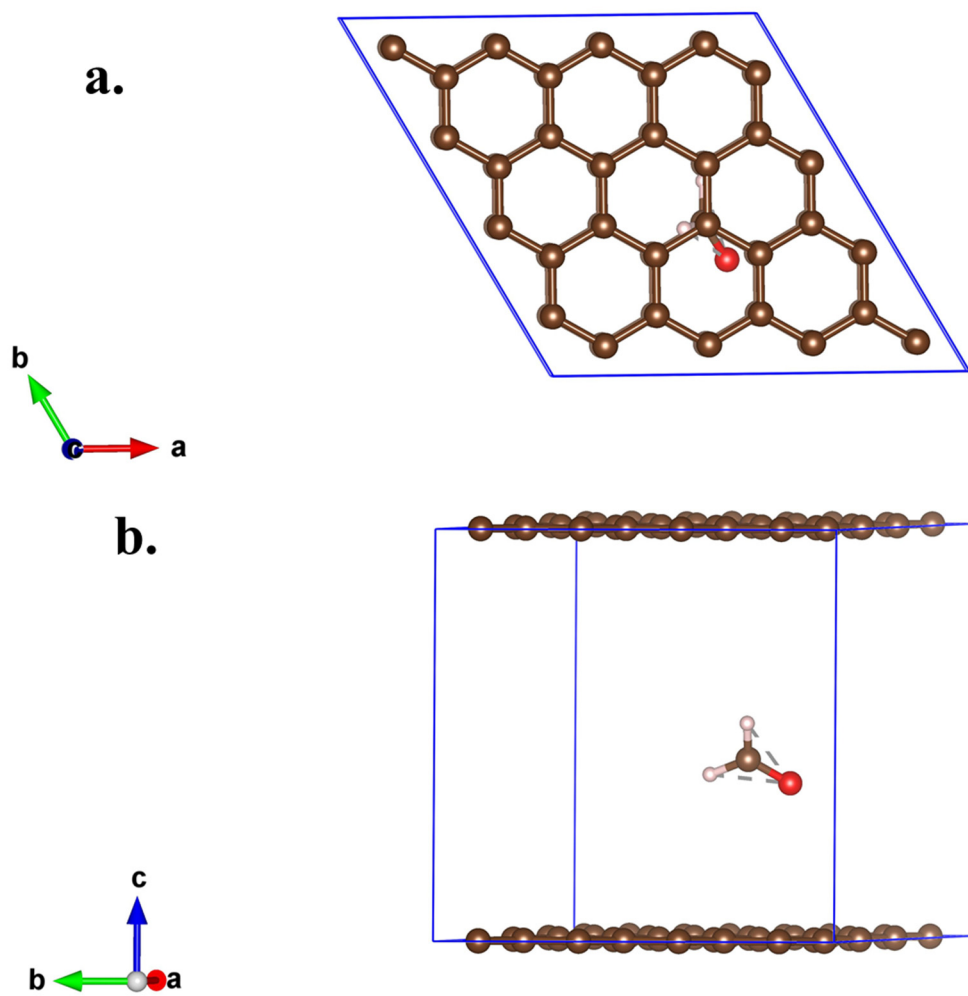

Figure S3. The original configuration (c) of formaldehyde molecules adsorbed on GH substrate.

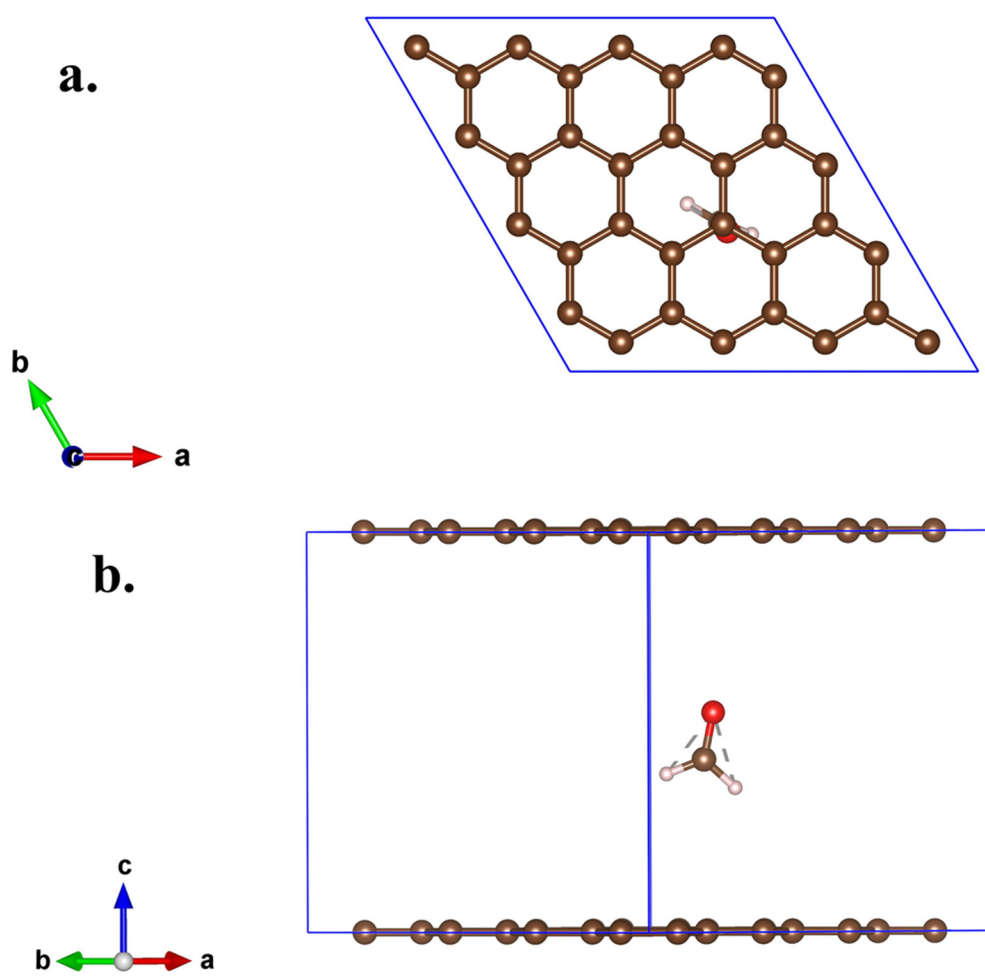

Figure S4. The original configuration (d) of formaldehyde molecules adsorbed on GH substrate.

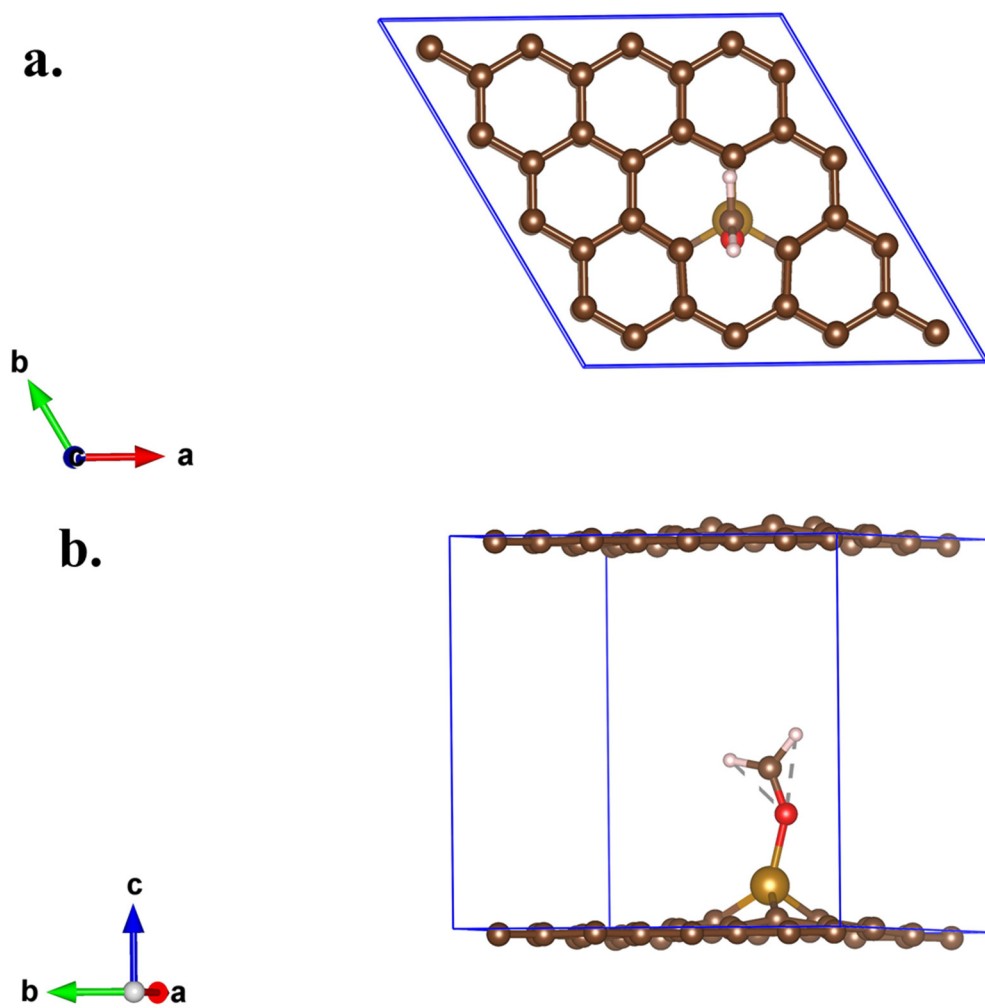

Figure S5. The original configuration (a) of formaldehyde molecules adsorbed on Fe-GH substrate.

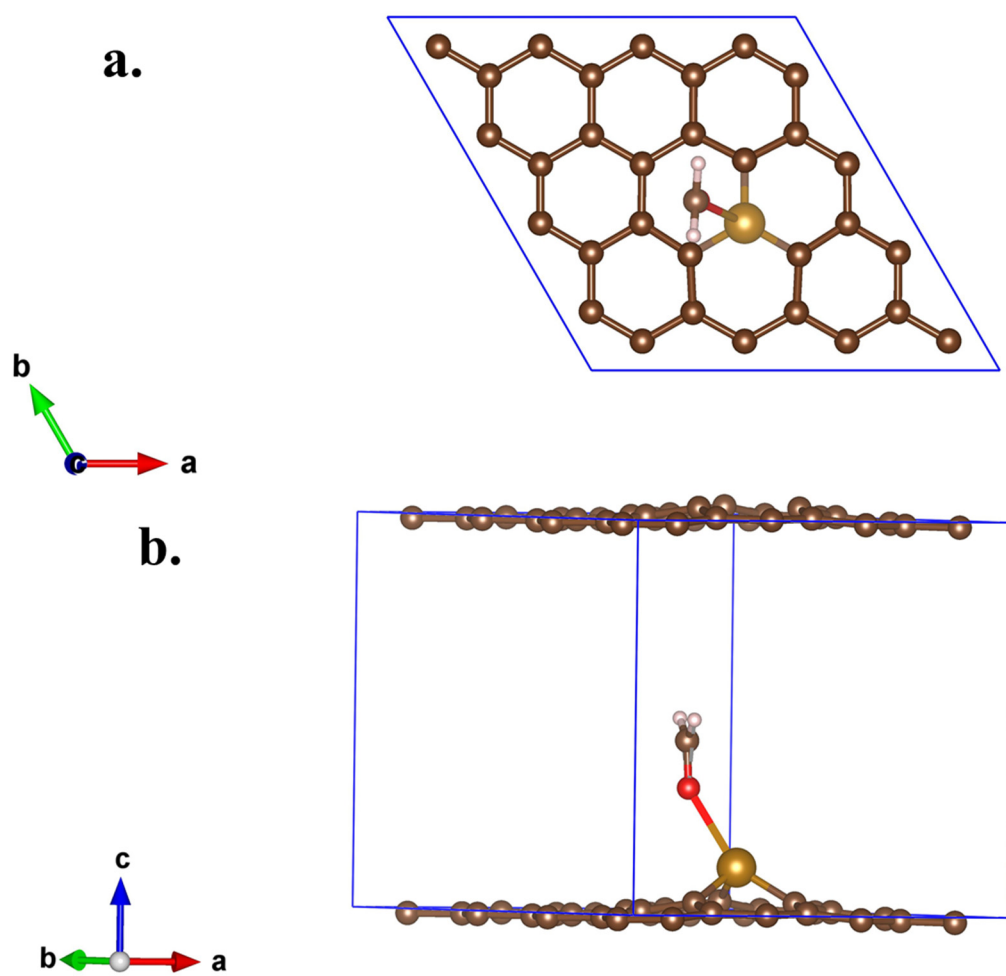

Figure S6. The original configuration (b) of formaldehyde molecules adsorbed on Fe-GH substrate.

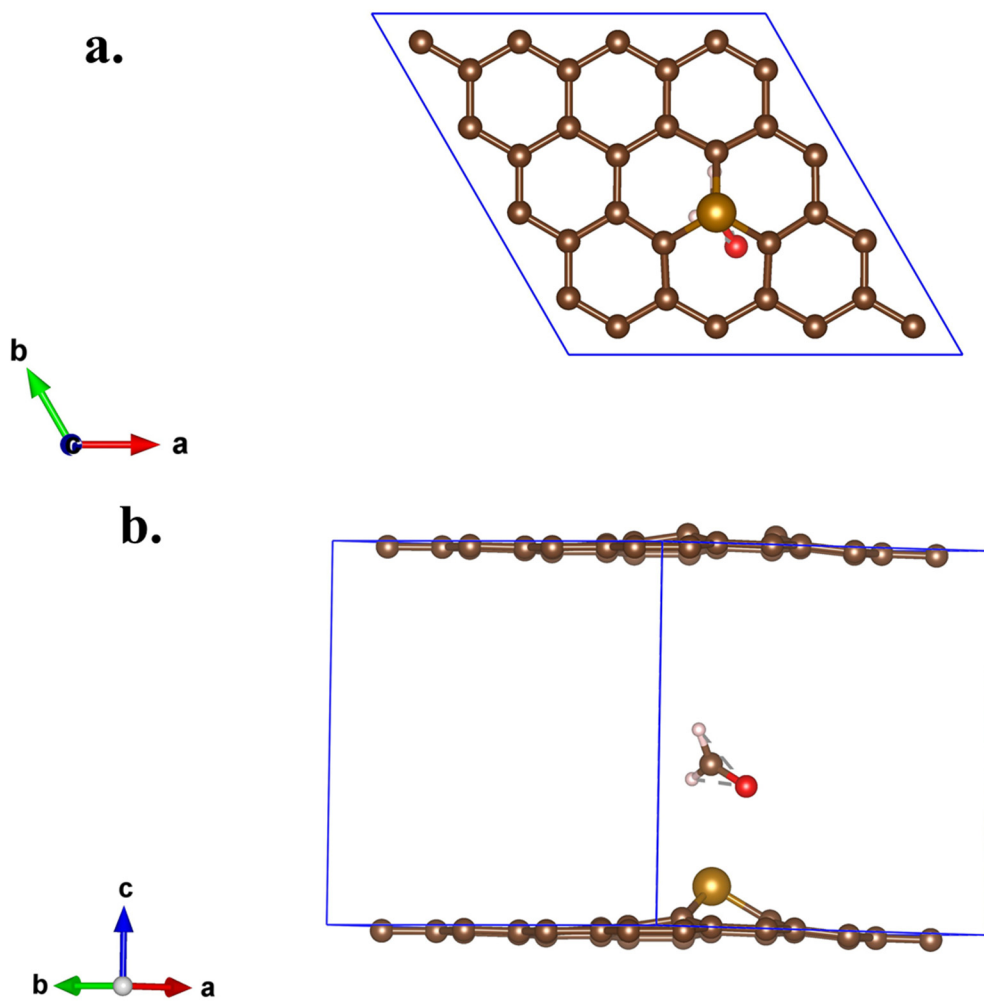

Figure S7. The original configuration (c) of formaldehyde molecules adsorbed on Fe-GH substrate.



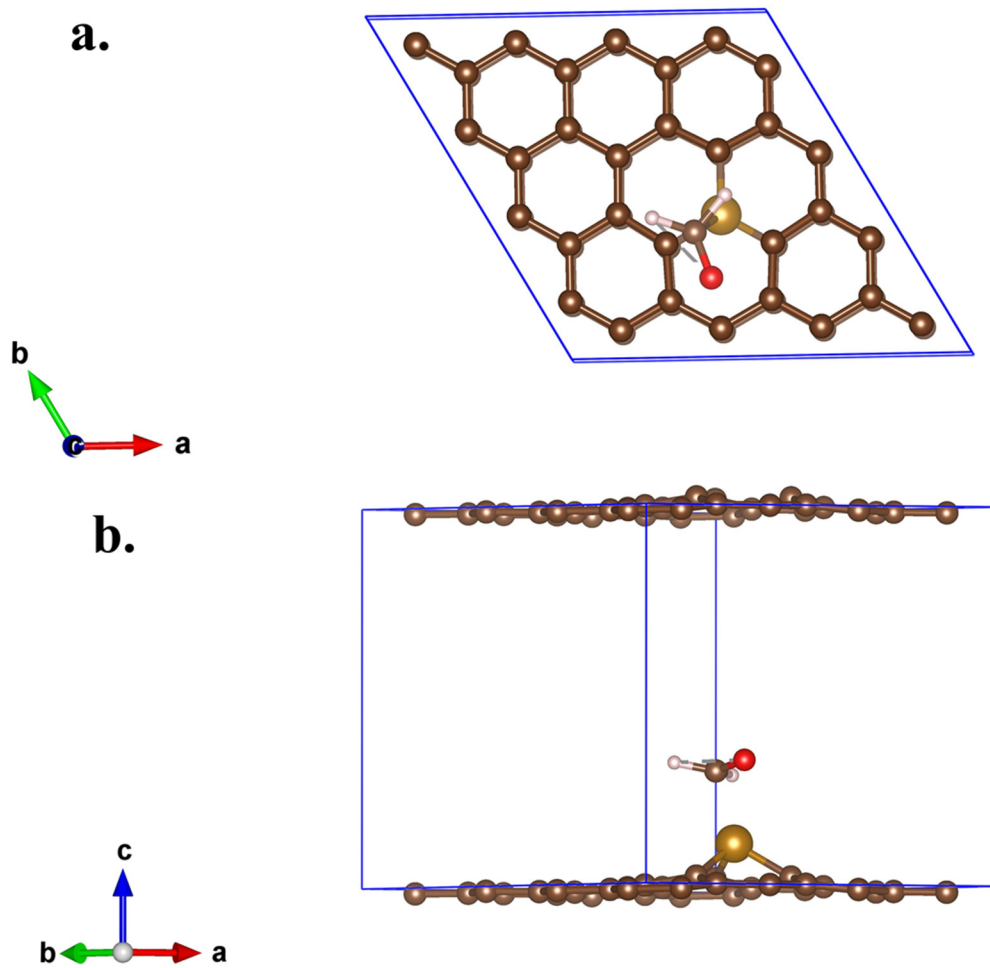

Figure S8. The original configuration (d) of formaldehyde molecules adsorbed on Fe-GH substrate.

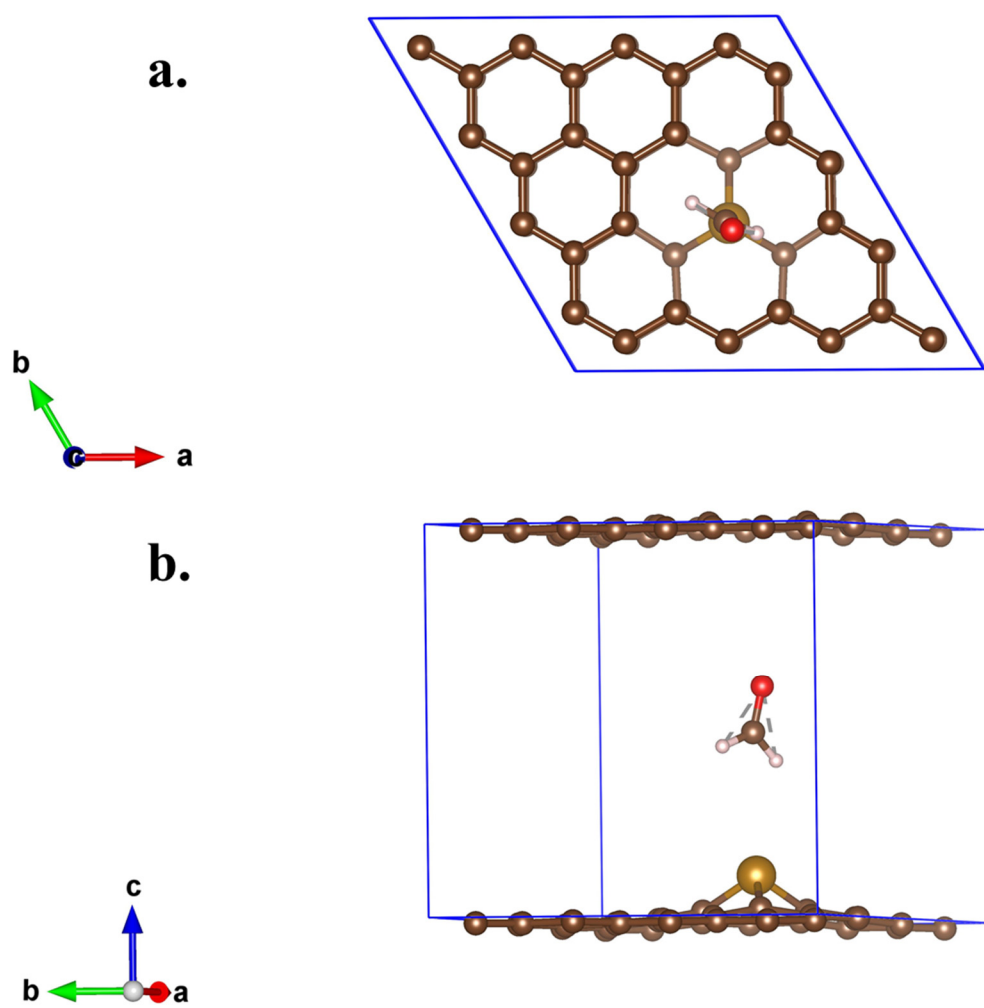

Figure S9. The original configuration (e) of formaldehyde molecules adsorbed on Fe-GH substrate.

**Table S1.** Bader charge before and after iron doping on GH substrate.

| <b>atoms</b> | <b>Before doped</b> | <b>After doped</b> | <b>change</b> |
|--------------|---------------------|--------------------|---------------|
| C1           | 3.962               | 4.159              | 0.197         |
| C2           | 3.971               | 4.387              | 0.416         |
| C3           | 3.987               | 4.150              | 0.164         |
| Fe           | 8.000               | 7.160              | -0.840        |
